# Supplementary material
Source: publisher figshare collection journal article supplement (https://gsajournals.figshare.com/ndownloader/files/20720472)
Supplement: Supplementary file 1 [file 20720472]

## Sheet: TableS1
species	#chromosomes	#genes	slope (l)	R2	p.value	S_d	beta	slope(-5)	R2(-5)	p-value(-5)
A. trichopoda	8	9002	-0.03079	0.0122	0.4706823	1.85e+22	0.021322045	-0.14312	0.1152	0.1168
A.thaliana	20	14308	-0.13308	0.4698	0.00382	208.0715692	0.262947282	-0.20209	0.7542	1.637e-05
S.bicolor	7	12382	-0.13228	0.5473	0.00116	273522.5492	0.10331407	-0.15113	0.6233	0.0002819
M.truncatula	20	7822	-0.015393	0.0081939	0.51873	3520000	0.076671273	-0.01805	-0.06365	0.6937
P.nigra	18	8009	-0.12091	0.19883	0.102593	7510000	0.081667091	-0.11810	0.1453	0.0889
P.tremula	20	17530	-0.165	0.6679	2.92e-05	27081.48075	0.13677788	-0.14738	0.4328	0.00458
P.tremuloides	20	16777	-0.1756	0.6351	4.4e-05	9513.471827	0.156690454	-0.14800	0.6423	0.000199
P.euphratica	40	12739	-0.033542	0.03494	0.3758	300000000	0.052221393	-0.09721	0.2191	0.04483
P.pruinosa	40	15872	0.15714	0.5765	0.000812	1740000	0.074766962	0.005517	0.9326	-0.07631
V.vinifera	20	10029	-0.010585	-0.002714	0.53938	2920000	0.082468092	-0.01496	-0.07498	0.8805
T. aestivum	5	13135	-0.1985	0.6614	0.0004	13631.07439	0.117827362	-0.11301	0.2179	0.04535
C.sativus	19	8107	-0.2008	0.37419	0.0346859	3760000	0.097784926	-0.15807	0.3058	0.019
C.hardwickii	10	8075	-0.02948	0.005111	0.52121	4390000	0.101323245	-0.07783	-0.02329	0.424
Z. mays	10	1676	-0.1959	0.292498	0.0379831	18769.08991	0.162600552	-0.16579	0.2745	0.02612
G.soja	20	23902	0.01296	0.00965	0.4587	5070000	0.075207188	-0.1847	0.08996	0.1466
G.max	20	23721	-0.005101	0.004733	0.43566	5.35e+48	0.01	-0.05874	-0.04836	0.562
C.sinensis	4	10983	-0.10496	0.38487	0.0164	1.93e+09	0.048424245	-0.09091	0.2632	0.0292
O.sativa	20	12416	-0.00658	-0.02686	0.6038	9.12e+13	0.028516702	-0.01644	-0.0603	0.6591
O.rufipogon	11	6305	-0.2551	0.6121	0.001	3190000	0.074351324	-0.31151	0.4939	0.00209
O.glab	13	8849	-0.09186	0.37368	0.0234	8.11e+16	0.026769072	-0.06629	0.3779	0.00873
O.barthii	9	6133	-0.06925	0.16368	0.1226006	8.94e+23	0.02054373	-0.11572	0.05067	0.20901
C.canephora	7	11528	0.1991	0.5222	0.00106	5640000	0.067941908	0.08392	0.1381	0.09499
C. lanatus	10	6038	-0.19304	0.18761	0.1244345	357.9045775	0.200255858	-0.25481	0.3883	0.007759
M.esculenta	14	12536	-0.01945	0.025044	0.386128	1.69e+15	0.036875397	-0.03299	-0.01368	0.384
H.vulgare	4	6232	0.06568	0.12179	0.1669793	4540000	0.079329761	-0.01498	-0.06763	0.7419
C. grandiflora	20	12667	-0.2898	0.8196	3.39e-07	954.9860899	0.283390544	-0.27222	0.7204	3.85e-05
P.dactylifera	20	14166	-0.07643	0.240101	0.0538646	20400000	0.067902271	-0.03901	-0.01052	0.3722
S.lycopersicon	5	14665	-0.1998	0.000184	0.6199	43400000	0.056347066	-0.14925	0.4151	0.00567
S.huaylasense	6	14684	-0.2914	0.000216	0.6211	5.97e+53	0.011645271	-0.4157	0.4673	0.00297
H.sapiens	20	18191	0.105273	0.046502	0.38661	10002.76568	0.12535229	-0.2185	0.09951	0.1345
P.troglodytes	20	16333	-0.12841	0.08777	0.28757	9517.764368	0.142391471	-0.3956	0.3142	0.01741
P.paniscus	20	15233	-0.195248	0.12181	0.2393388	9478.600653	0.126442144	-0.2271	0.1624	0.0761
G. gorilla	20	12348	-0.053642	0.028298	0.412998	6536.50279	0.136471801	-0.15955	0.2861	0.02325
G. graueri	6	13334	-0.087203	0.09082	0.326128	3920000	0.076851226	-0.20960	0.2629	0.0293
P. abelii	10	15925	-0.06348	0.001645	0.49322	176632.7316	0.112477663	-0.31915	0.7538	1.655e-05
P. pygmaeus	10	15570	-0.11097	0.08732	0.263535	49157.40682	0.117581567	-0.27782	0.5856	0.0005365
P. papio	4	13335	0.11973	0.3219	0.0179	66300000	0.057833203	-0.08248	-0.02491	0.4313
P. ursinus	4	13283	0.1747	0.4082	0.00409	69900000	0.062022659	0.04078	-0.06097	0.6656
C. jacchus	10	12859	0.2204	0.5907	0.000123	1.09e+44	0.00999999	0.1148	0.0009799	0.3324
C. familiaris	20	12670	-0.16431	0.125731	0.2395	58538.91338	0.148629986	-0.2936	0.2217	0.04371
C. lupus	8	12665	-0.1555	0.11165	0.199697	123933.2123	0.141824095	-0.35445	0.4613	0.00321
B. taurus	18	13714	-0.09646	0.02092	0.37583	1.94e+09	0.075685116	-0.2152	0.1356	0.097166
O. latipes	20	5478	-0.01919	0.02083	0.4351	1290000	0.106989872	-0.06800	-0.03471	0.4794
O. niloticus	6	4939	-0.372	0.08717	0.1503	389319.476	0.109072768	-0.2716	-0.008202	0.3637
G. conirostris	20	2142	-0.3293	0.136386	0.233182	2990000	0.129853019	-0.3212	0.1295	0.1026
D.melanogaster	20	3686	-0.4243	0.7958	3.94e-06	3974.566141	0.347297266	-0.40317	0.7988	4.37e-06
C. briggsae	10	2497	-0.20332	0.18928	0.1225722	435.2635717	0.242110286	-0.26570	0.382	0.00833
M. castaneus	20	19126	-0.022442	0.006106	0.48217	1890000	0.122589716	-0.15436	0.2057	0.05091
A. arabiensis	20	6763	-0.2387	0.6917	7.67e-05	3966.393817	0.317476941	-0.26315	0.5852	0.00054
A. epiroticus	20	6558	-0.2873	0.5709	0.00118	3844.612974	0.243166406	-0.34489	0.5538	0.0008843
A. farauti	20	6264	-0.3115	0.4937	0.00448	27491.72162	0.202916231	-0.37540	0.6613	0.000138
A. funestus	12	6867	-0.4141	0.7947	5.43e-07	35258.79598	0.267911067	-0.38183	0.74	2.38e-05
A. melas	12	7148	-0.1821	0.30286	0.0201097	29934.62801	0.189863622	-0.02452	-0.07275	0.8256
A. merus	20	6665	-0.2608	0.6139	0.000194	2218.056088	0.309945788	-0.2981	0.567	0.0007221
A. quadriannuatus	20	6620	-0.1478	0.4223	0.0117	10813.37126	0.274193762	-0.19368	0.5152	0.001555
H. melpomene	8	6567	-0.2719	0.7328	4.29e-06	15840.97789	0.26019666	-0.33241	0.836	1.133e-06
H. chinoneus	8	6437	-0.3324	0.7134	1.83e-05	9256.968993	0.284517894	-0.44241	0.8041	3.66e-06
H. timareta	8	6434	-0.2142	0.6244	0.000243	1790000	0.159669111	-0.21311	0.5176	0.0015
H. pardalinus	4	6459	-0.3673	0.6618	7.2e-05	1.49e+12	0.083838116	-0.40164	0.6631	0.000133
note: slope (-5), R2(-5), p-value(-5) are correlation results of log(piN/piS) and log(piS) with five highest piS bins removed
